# Supplementary material for: Clinical features and survival of pregnancy-associated breast cancer: a retrospective study of 203 cases in China
Source: PubMed Central journal article supplement (PMC7092544; doi:10.1186/s12885-020-06724-5), 2020-03-23

Fig. S2A

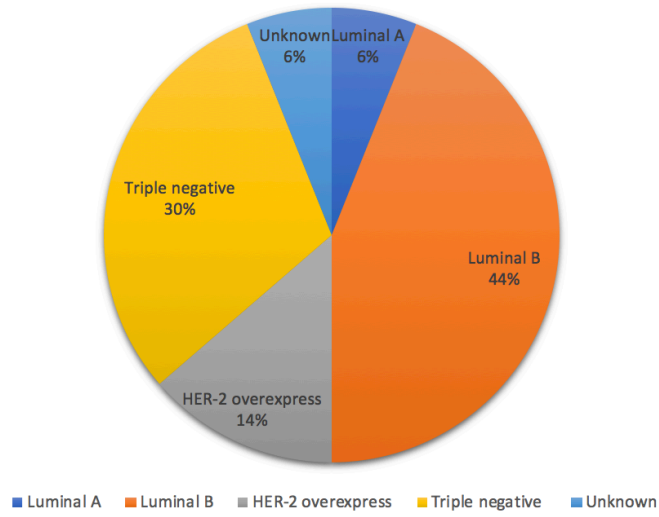

Fig. S2B

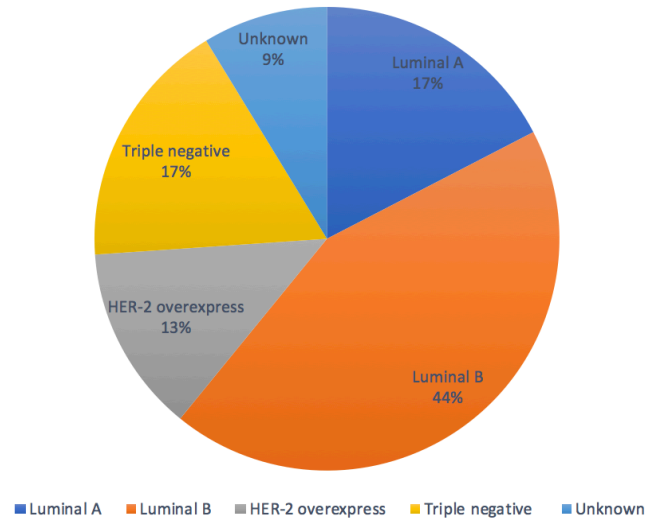

Fig. S2C

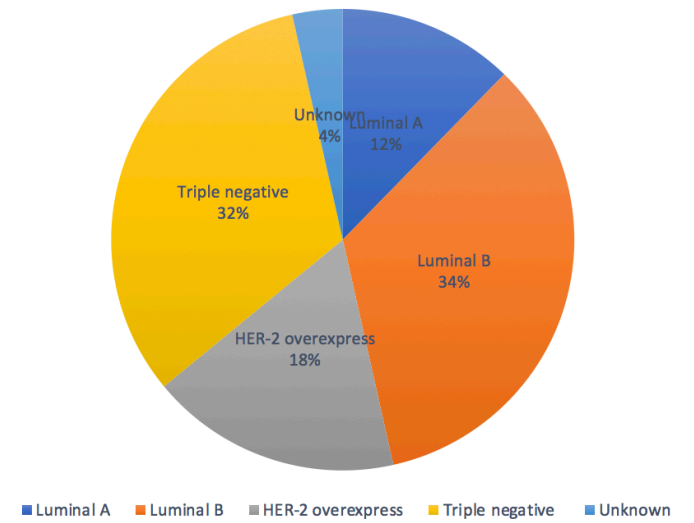

Supplement: 12885_2020_6724_MOESM2_ESM.pdf [file 12885_2020_6724_MOESM2_ESM.pdf]
